# Supplementary material
Source: HighWire-hosted journal article supplement (http://www.jneurosci.org/highwire/filestream/601072/field_highwire_adjunct_files/0/Supplemental_Material.pdf)
Supplement: Supplemental_Material.pdf [file Supplemental_Material.pdf]

Coordination between extrinsic extracellular matrix cues and intrinsic responses to orient the centrosome in polarizing cerebellar granule neurons

Shailesh Kumar Gupta<sup>1</sup>, Karina Meiri<sup>2</sup>, Kashif Mahfooz<sup>1</sup>, Upasna Bharti<sup>1</sup> and Shyamala Mani<sup>1\*</sup>

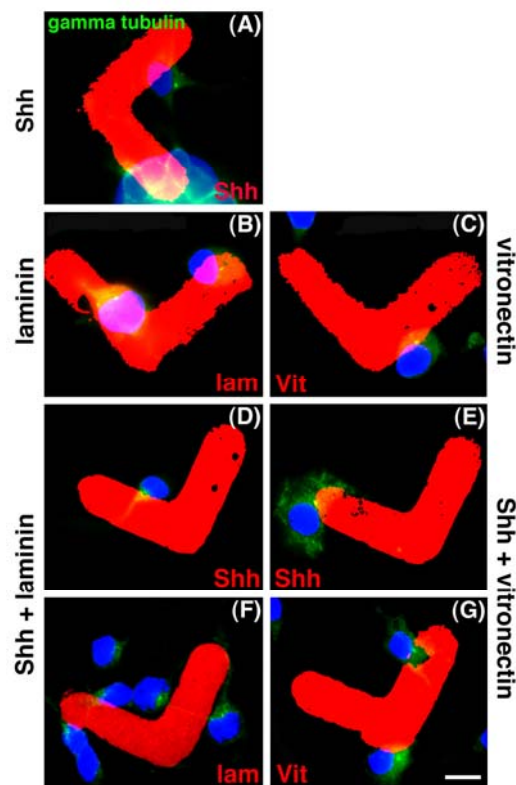

**Supplementary Figure 1: Contact staining.**

Immunoreactivity of printed protein patterns (red) and cells labeled with  $\gamma$ -tubulin (green). (A) Shh printed and stained (red), (B) Laminin printed and stained (red), (C) vitronectin printed and stained (red), (D and F) Shh+laminin is printed and stained for

(D) Shh and (F) laminin (red), (E and G) Shh+vitronectin is printed and stained for (E) Shh and (G) vitronectin (red) showing the retention of proteins on the coverslip after printing. Scale bar = 8 $\mu$ m.

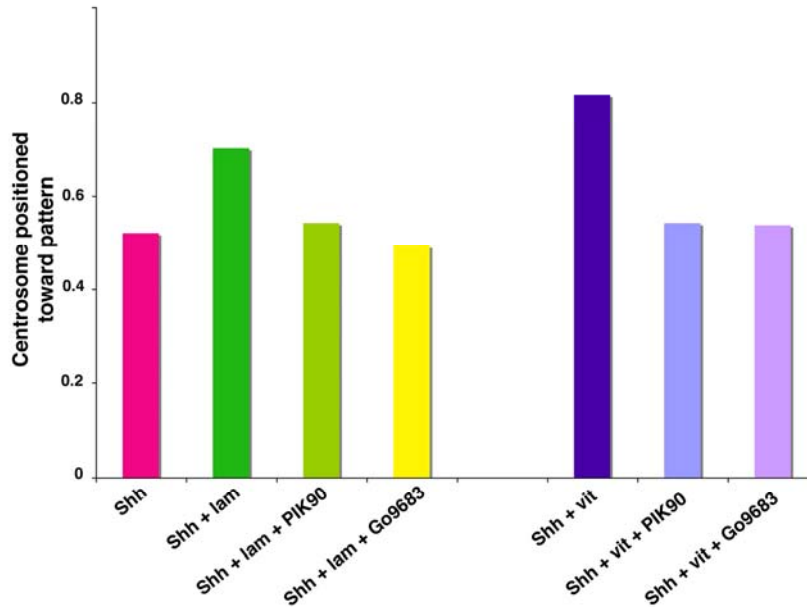

### Supplementary Figure 2: Inhibitor contact quantitation.

Proportion of P8 granule cells with centrosomes positioned toward Shh (pink bar), Shh + laminin (dark green bar), Shh + laminin with 1 $\mu$ M PIK90 (light green bar), Shh + laminin with 1 $\mu$ M Go9683 (yellow bar), Shh + vitronectin (dark blue bar), Shh + vitronectin with 1 $\mu$ M PIK 90 (light blue bar), Shh + vitronectin with 1 $\mu$ M Gö 6983 (violet bar). Data is the mean from 2 independent experiments. ( $\geq 400$  cells were counted in each experiment).

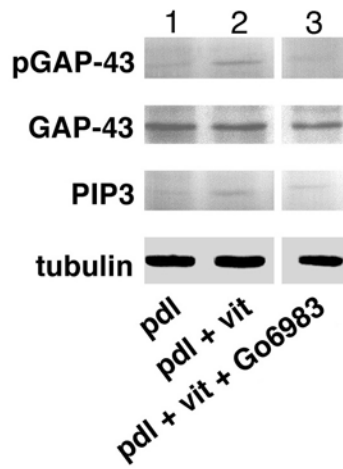

**Supplementary Figure 3: PKC inhibition western.**

Representative Western blot from P8 granule cells after 48 hours of culture probed with anti-pGAP-43, GAP-43, PIP3 and tubulin. Lane 1, poly-d-lysine (PDL); Lane 2, PDL + vitronectin; Lane 3, PDL + vitronectin in the presence of 1 $\mu$ M Go9683 (PKC inhibitor).

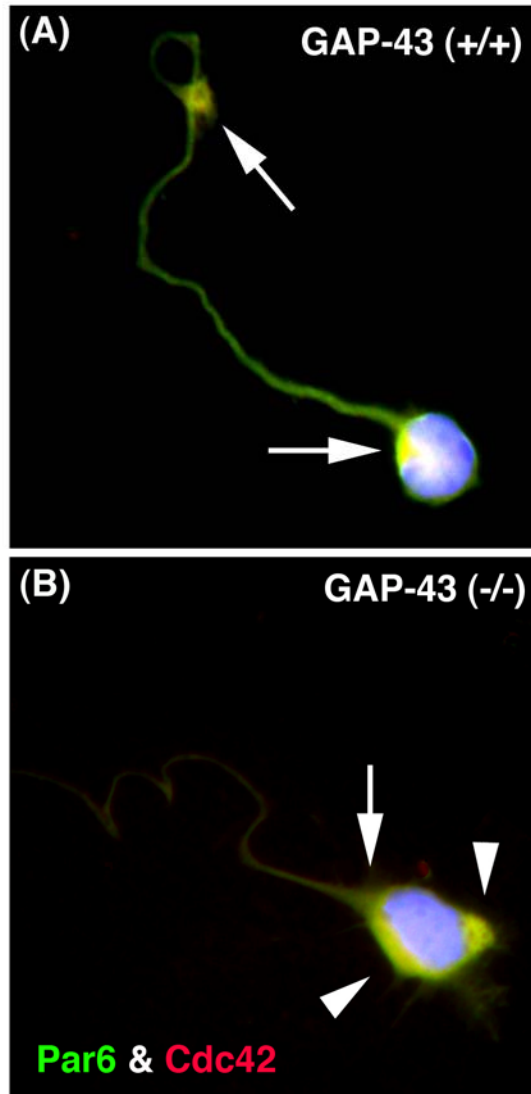

**Supplementary Figure 4: Cdc42/Par6.**

Immunoreactivity of Par6 (green) and Cdc42 (red) in P0 granule cells. (A) GAP-43 (+/+); (B) GAP-43 (-/-). Arrow in (A) indicates regions where Par6 and Cdc42 are colocalized at the base of the primary process. Arrow in (B) indicates the expression not being localized at the base of the axon. Arrowheads in (B) indicates region where only Par6 is localized and region where Par6 and Cdc42 are colocalized but not at the base of the

primary process. Representative images from  $n \geq 40$  cells from two independent experiments. Scale bar =  $8\mu\text{m}$ .

**TABLE-1**

| PROTEIN PRINTED<br>↓                   | ANIMALS USED<br>→ | P0 (WT) | P0 (KO) | P8 (WT) |
|----------------------------------------|-------------------|---------|---------|---------|
| Shh                                    | Contact           | 136     | 165     | 142     |
|                                        | Non-contact       | 266     | 317     | 401     |
| Laminin                                | Contact           | 101     | 110     | 166     |
|                                        | Non-contact       | 298     | 322     | 193     |
| Shh+ Laminin                           | Contact           | 155     | 121     | 236     |
|                                        | Non-contact       | 394     | 315     | 409     |
| Vitronectin                            | Contact           | 138     | 120     | 108     |
|                                        | Non-contact       | 398     | 374     | 262     |
| Shh+Vitronectin                        | Contact           | 139     | 173     | 127     |
|                                        | Non-contact       | 294     | 255     | 274     |
| Laminin+ $\alpha 6\beta 1$             | Contact           |         |         | 095     |
|                                        | Non-contact       |         |         | 226     |
| Vitronectin+ $\alpha 5\beta 3$         | Contact           |         |         | 112     |
|                                        | Non-contact       |         |         | 254     |
| Shh+Vitronectin<br>+Cyclopamine        | Contact           | 089     |         | 088     |
|                                        | Non-contact       | 239     |         | 201     |
| Shh+Vitronectin<br>+Shh antibody       | Contact           | 064     |         | 071     |
|                                        | Non-contact       | 159     |         | 178     |
| Shh+Vitronectin<br>+ $\alpha 6\beta 1$ | Contact           |         |         | 089     |
|                                        | Non-contact       |         |         | 172     |
| Shh+Vitronectin<br>+ $\alpha 5\beta 3$ | Contact           | 093     |         | 087     |
|                                        | Non-contact       | 204     |         | 254     |
| Shh+Laminin+<br>Wartmanin              | Contact           |         |         | 086     |
|                                        | Non-contact       |         |         | 248     |
| Shh+Vitronectin+<br>Wartmanin          | Contact           |         |         | 074     |
|                                        | Non-contact       |         |         | 241     |
| Shh+Laminin+<br>BIS.                   | Contact           |         |         | 067     |
|                                        | Non-contact       |         |         | 227     |
| Shh+Vitronectin+<br>BIS.               | Contact           |         |         | 063     |
|                                        | Non-contact       |         |         | 228     |

**Supplementary Table 1: Total number of cells counted on protein patterns.**

The number of contact and non contact cells included in the centrosome position analysis of each experimental condition.

Contact cell = cells touching the protein pattern.

Non contact cell = cells not touching the protein pattern.
